# Supplementary material for: 5-Year health-related quality of life outcome in patients with idiopathic normal pressure hydrocephalus
Source: PubMed Central journal article supplement (PMC8357651; doi:10.1007/s00415-021-10477-x), 2021-03-02

Timeline for each study participant

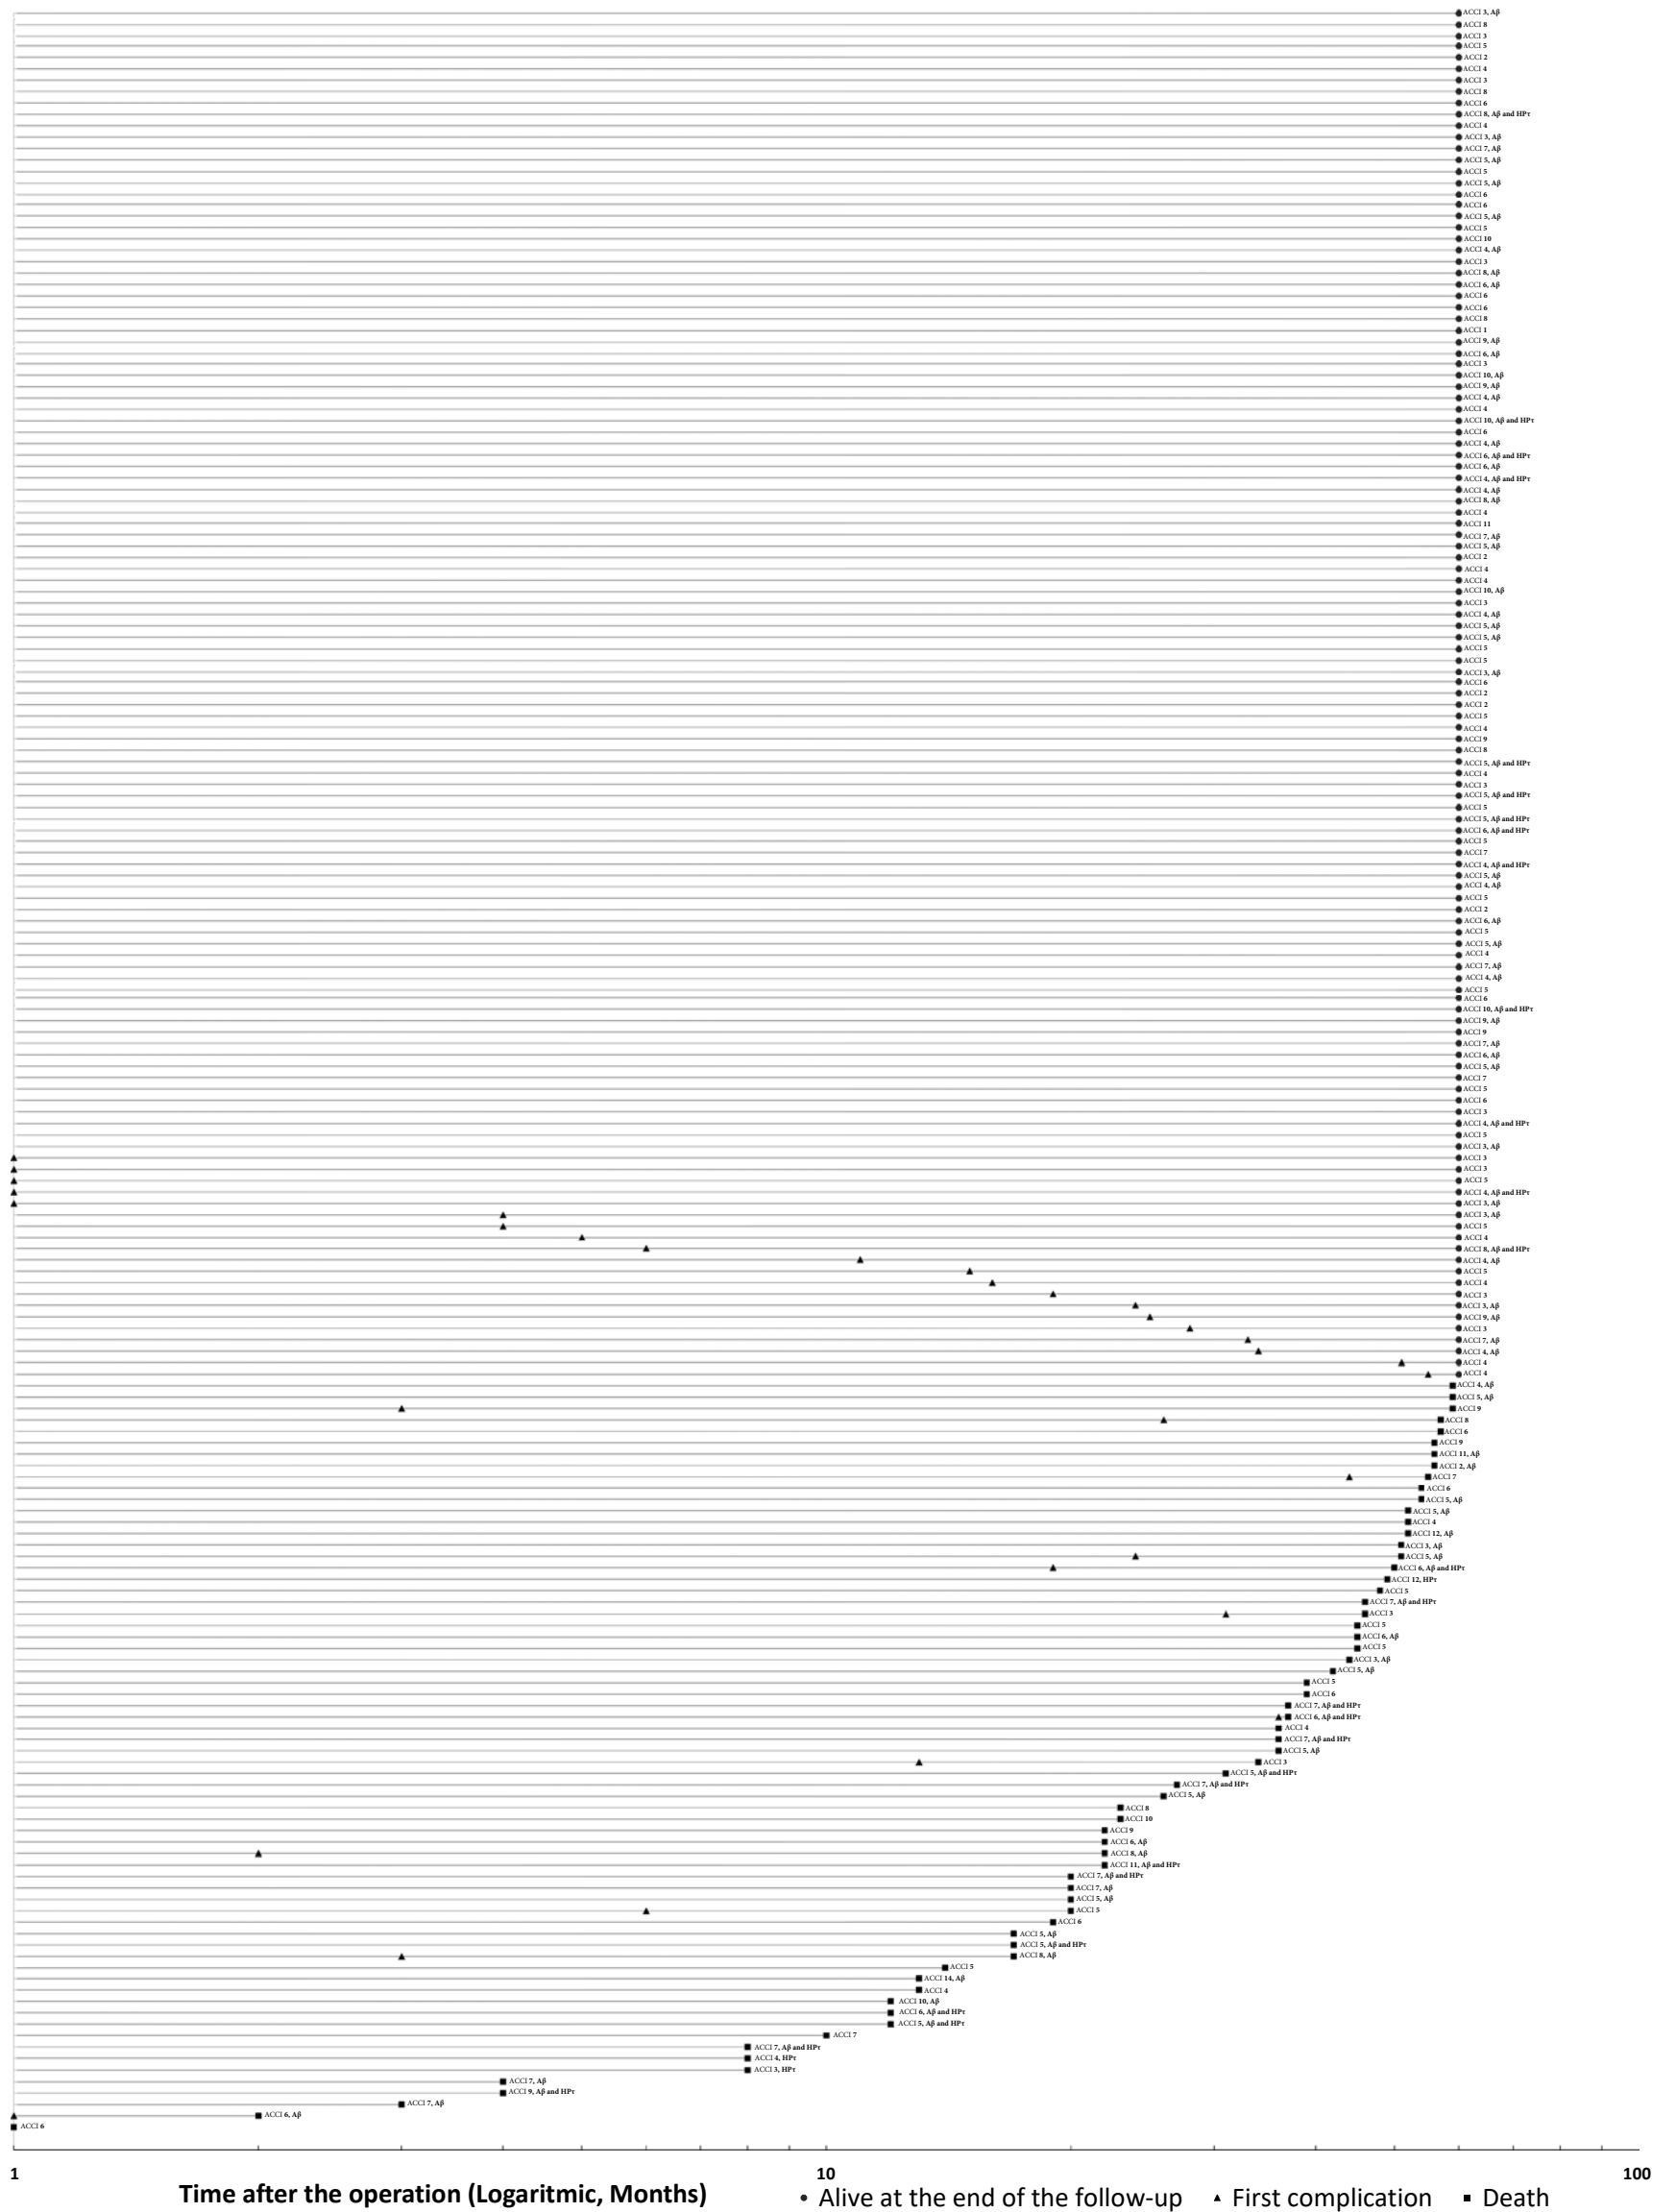

Supplement: 415_2021_10477_MOESM4_ESM.pdf [file 415_2021_10477_MOESM4_ESM.pdf]
